# Supplementary material
Source: PubMed Central journal article supplement (PMC1855429)

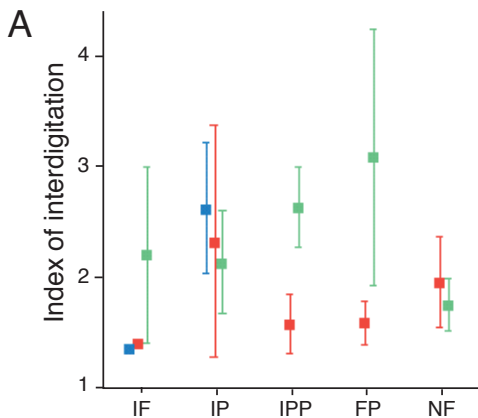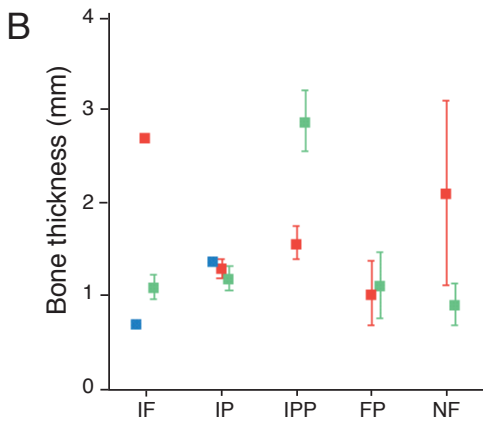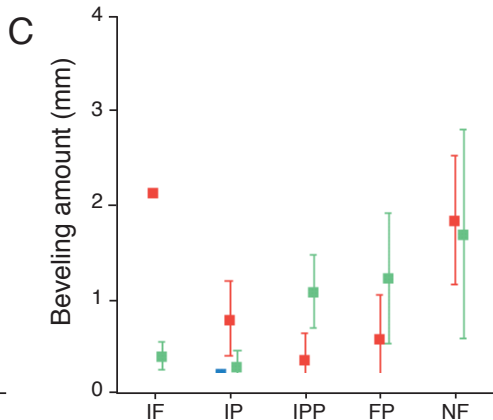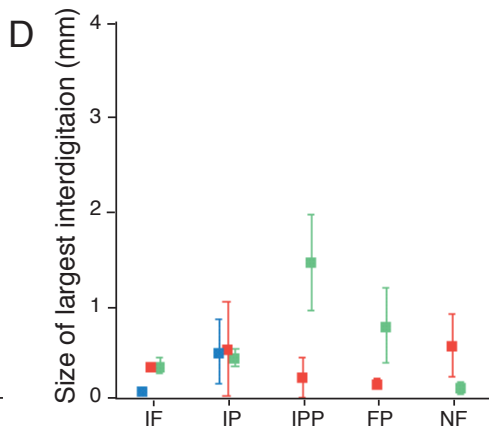

Supplement: pnas_0701706104_1.pdf [file pnas_0701706104_1.pdf]
